# Supplementary material for: Functional Basis of Microorganism Classification
Source: PLoS Comput Biol. 2015 Aug 28;11(8):e1004472. doi: 10.1371/journal.pcbi.1004472 (PMC4552647; doi:10.1371/journal.pcbi.1004472)
Supplement: S2 Data — (XLSX) [file pcbi.1004472.s013.xlsx]

## Sheet: Marine functions
Cluster	#Sequence	#Bacteria	Annotation
C_1	424	349	Malate:quinone oxidoreductase (EC 1.1.99.16)	Malate:quinone oxidoreductase (EC 1.1.5.4)	hypothetical protein
C_2	153	74	Glucose-methanol-choline (GMC) oxidoreductase:NAD binding site
C_3	123	118	FIG00814722: hypothetical protein	Ribokinase (EC 2.7.1.15)	FRUCTOKINASE (EC 2.7.1.4)	Fructokinase (EC 2.7.1.4)	Tagatose-6-phosphate kinase (EC 2.7.1.144) / 1-phosphofructokinase (EC 2.7.1.56)
C_4	92	92	Peptidylprolyl isomerase (EC 5.2.1.8)	FKBP-type 22KD peptidyl-prolyl cis-trans isomerase (rotamase)	FKBP-type peptidyl-prolyl cis-trans isomerase	Peptidylprolyl isomerase( EC:5.2.1.8 )
C_5	73	35	carboxysome shell protein CsoS1
C_6	56	56	Endonuclease III (EC 4.2.99.18)
C_7	51	51	Light-independent protochlorophyllide reductase subunit N (EC 1.18.-.-)
C_8	46	44	GTP cyclohydrolase I (EC 3.5.4.16) type 1
C_9	40	39	UDP-glucose dehydrogenase (EC 1.1.1.22)
C_10	35	34	carboxysome shell protein CsoS3
C_11	33	33	carboxysome shell protein CsoS2
C_12	29	18	Phosphate ABC transporter, periplasmic phosphate-binding protein PstS (TC 3.A.1.7.1)
C_13	28	28	FIG00940838: hypothetical protein	FIG00852745: hypothetical protein	FIG01150874: hypothetical protein	hypothetical protein
C_14	27	18	AbrB family transciptional regulator
C_15	24	24	Sirohydrochlorin cobaltochelatase (EC 4.99.1.3)
C_16	21	18	Band 7 protein
C_17	19	19	putative carboxysome peptide A
C_18	19	19	23S rRNA (guanosine-2'-O-) -methyltransferase rlmB (EC 2.1.1.-)	ATP-dependent RNA helicase NGO0650
C_19	19	18	HNH endonuclease:HNH nuclease
C_20	19	18	Glycine oxidase ThiO (EC 1.4.3.19)
C_21	19	18	Ferric iron ABC transporter, iron-binding protein
*C_22	19	18	putative GPH family sugar transporter	FIG019731: Sugar transporter
C_23	19	18	Possible alpha/beta hydrolase superfamily, slr1917 homolog
C_24	18	18	Phosphatidate cytidylyltransferase (EC 2.7.7.41)
C_25	18	18	Lysine decarboxylase (EC 4.1.1.18)
C_26	18	18	rRNA small subunit methyltransferase I
*C_27	18	18	DNA repair enzyme, contains HhH domain and nuclease of RecB family
C_28	18	18	Error-prone, lesion bypass DNA polymerase V (UmuC)
C_29	18	18	Probable 2-phosphosulfolactate phosphatase (EC 3.1.3.71)
C_30	18	18	SSU ribosomal protein S14p (S29e) @ SSU ribosomal protein S14p (S29e), zinc-independent
C_31	18	18	Isochorismate synthase (EC 5.4.4.2) @ Phylloquinone-specific isochorismate synthase (EC 5.4.4.2)	Isochorismate synthase (EC 5.4.4.2) @ Menaquinone-specific isochorismate synthase (EC 5.4.4.2)
C_32	18	18	possible serine protease
C_33	18	18	Sugar/maltose fermentation stimulation protein homolog
C_34	18	18	Cyanobacteria-specific protein
C_35	18	18	Exodeoxyribonuclease V alpha chain (EC 3.1.11.5)
C_36	18	18	Peptide methionine sulfoxide reductase MsrA (EC 1.8.4.11)
C_37	18	18	Uncharacterized monothiol glutaredoxin ycf64-like
C_38	18	18	Single-stranded DNA-binding protein
C_39	18	18	Peptide deformylase (EC 3.5.1.88)
C_40	18	18	Inorganic pyrophosphatase (EC 3.6.1.1)
C_41	18	18	Epoxyqueuosine (oQ) reductase QueG
C_42	18	18	Phosphopantetheine adenylyltransferase (EC 2.7.7.3)
C_43	18	18	Permease of the drug/metabolite transporter (DMT) superfamily
C_44	18	18	Possible alpha/beta hydrolase superfamily, slr1235 homolog
C_45	18	18	tmRNA-binding protein SmpB
C_46	18	18	tRNA (guanosine(18)-2'-O)-methyltransferase (EC 2.1.1.34)
C_47	18	18	FAD/FMN-containing dehydrogenase
C_48	18	18	Signal transduction histidine kinase
C_49	18	18	Probable 30S ribosomal protein PSRP-3
C_50	18	18	RNA-binding region RNP-1 (RNA recognition motif)
C_51	18	18	Heat shock protein GrpE
C_52	18	18	Nucleoside-diphosphate-sugar epimerases
C_53	18	18	Cobalt-precorrin-6 synthase, anaerobic
C_54	18	18	23S rRNA (guanine-N-2-) -methyltransferase rlmL EC 2.1.1.-)	Methyltransferase (EC 2.1.1.-)
C_55	18	18	Lipid-A-disaccharide synthase (EC 2.4.1.182)
*C_56	18	18	FIG00940178: hypothetical protein	FIG01151133: hypothetical protein
*C_57	18	18	FIG00940991: hypothetical protein	Phosphate-binding protein	FIG01149351: hypothetical protein
*C_58	18	18	Phosphoadenylyl-sulfate reductase [thioredoxin] (EC 1.8.4.8)
C_59	18	18	Trk system potassium uptake protein TrkA
C_60	18	18	FIG00566423: hypothetical protein
C_61	18	18	Oligoketide cyclase/lipid transport protein homolog
C_62	18	18	probable iron binding protein from the HesB_IscA_SufA family
C_63	18	18	Cell division inhibitor
C_64	18	18	Thymidylate kinase (EC 2.7.4.9)
C_65	18	18	Segregation and condensation protein A
C_66	18	18	1,4-dihydroxy-2-naphthoate octaprenyltransferase (EC 2.5.1.74)
C_67	18	18	Glutathione synthetase (EC 6.3.2.3)
C_68	18	18	Histidinol-phosphate aminotransferase (EC 2.6.1.9)
*C_69	18	18	Quinolinate phosphoribosyltransferase [decarboxylating] (EC 2.4.2.19)
C_70	18	18	L-threonine 3-O-phosphate decarboxylase (EC 4.1.1.81)
C_71	18	18	Sulfate adenylyltransferase, dissimilatory-type (EC 2.7.7.4)
C_72	18	18	Photosystem II manganese-stabilizing protein (PsbO)
C_73	18	18	Phosphopantothenoylcysteine decarboxylase (EC 4.1.1.36) / Phosphopantothenoylcysteine synthetase (EC 6.3.2.5)
C_74	18	18	Hemolysins and related proteins containing CBS domains
C_75	18	18	ADP-ribose pyrophosphatase (EC 3.6.1.13)
C_76	18	18	Possible ABC transporter, ATP-binding component
C_77	18	18	NAD(P)H-quinone oxidoreductase chain J (EC 1.6.5.2)
C_78	18	18	Photosystem II stability/assembly factor HCF136/Ycf48
C_79	18	18	Periplasmic protease
*C_80	18	18	tRNA-(ms[2]io[6]A)-hydroxylase (EC 1.-.-.-)
C_81	18	18	CBSS-74546.3.peg.720: hypothetical protein
C_82	18	18	DNA recombination and repair protein RecO
C_83	18	18	Ribosomal subunit interface protein
*C_84	18	18	FIG00940799: hypothetical protein	FIG01151961: hypothetical protein
C_85	18	18	Cysteine desulfurase (EC 2.8.1.7)
C_86	18	18	Cytochrome c oxidase polypeptide III (EC 1.9.3.1)
C_87	18	18	Cytochrome c oxidase polypeptide II (EC 1.9.3.1)
C_88	18	18	Heme O synthase, protoheme IX farnesyltransferase (EC 2.5.1.-) COX10-CtaB
C_89	18	18	Cyanobacterial polyprenyltransferase (UbiA homolog)
*C_90	18	18	NhaP-type Na+/H+ or K+/H+ antiporter
C_91	18	18	Inorganic pyrophosphatase (EC 3.6.1.1)
C_92	18	18	Geranylgeranyl diphosphate reductase (EC 1.3.1.83)	Electron transfer flavoprotein-ubiquinone oxidoreductase (EC 1.5.5.1)	Geranylgeranyl reductase (EC 1.3.1.83)
C_93	18	18	FIG00940617: hypothetical protein	FIG01149819: hypothetical protein
C_94	18	18	SSU ribosomal protein S1p
*C_95	18	18	Creatinine amidohydrolase (EC 3.5.2.10)	Creatinine amidohydrolase related enzyme
C_96	18	18	Sepiapterin reductase (EC 1.1.1.153)
C_97	18	18	Ribulose bisphosphate carboxylase small chain (EC 4.1.1.39)
C_98	18	18	putative carboxysome peptide B
C_99	18	18	N-acetyltransferase (GNAT) family, Syn7942_0773 homolog, Ycf52 protein
C_100	18	18	putative CaCA family, sodium/calcium exchanger	Inner membrane protein YrbG, predicted calcium/sodium:proton antiporter
*C_101	18	18	Cyanobacteria-specific RpoD-like sigma factor, type-14
C_102	18	18	Queuosine biosynthesis QueD, PTPS-I
C_103	18	18	Nucleoside-diphosphate-sugar epimerases
C_104	18	18	Homoserine kinase (EC 2.7.1.39)
C_105	18	18	Glucokinase (EC 2.7.1.2)
*C_106	18	18	FIG01150715: hypothetical protein	FIG00940124: hypothetical protein	FIG00944210: hypothetical protein
*C_107	18	18	FIG01149793: hypothetical protein	FIG00942067: hypothetical protein
C_108	18	18	N-acetylmuramoyl-L-alanine amidase (EC 3.5.1.28)
*C_109	18	18	possible DNA polymerase III, epsilon subunit( EC:2.7.7.7 )	possible DNA polymerase III, epsilon subunit
C_110	18	18	Ferric uptake regulation protein FUR
C_111	18	18	Homoserine O-succinyltransferase (EC 2.3.1.46)
C_112	18	18	Possible ABC transporter, ATP-binding component
C_113	18	18	COG1836
C_114	18	18	FIG00940448: hypothetical protein	Arylesterase-like protein slr1119	FIG01149619: hypothetical protein
C_115	18	18	Phosphoribosylaminoimidazole carboxylase ATPase subunit (EC 4.1.1.21)
*C_116	18	18	putative potassium channel, VIC family
*C_117	18	18	Oxidoreductase, N-terminal:Oxidoreductase, C-terminal, utilizes NADP or NAD
*C_118	18	18	FIG00941659: hypothetical protein	FIG01149376: hypothetical protein
C_119	18	18	CheY-like domain containing protein
C_120	18	18	NAD dependent epimerase/dehydratase
C_121	18	18	Selenophosphate-dependent tRNA 2-selenouridine synthase
C_122	18	18	DnaJ-class molecular chaperone CbpA
C_123	18	18	DIM6/NTAB family protein
C_124	18	18	SSU ribosomal protein S18p @ SSU ribosomal protein S18p, zinc-independent
C_125	18	18	Ribokinase (EC 2.7.1.15)
*C_126	18	18	Serine peptidase (Alpha/beta hydrolase superfamily) fused to N- terminal uncharacterized domain specific to cyanobacteria
C_127	18	18	OpcA, an allosteric effector of glucose-6-phosphate dehydrogenase, cyanobacterial
C_128	18	18	Clock-associated two-component sensor histidine kinase SasA
C_129	18	18	Hypothetical protein YbbP, contains nucleotide-binding domain of DisA bacterial checkpoint controller
C_130	18	18	Two-component response regulator
C_131	18	18	possible membrane fusion protein
C_132	18	18	NAD(P) transhydrogenase alpha subunit (EC 1.6.1.2)
C_133	18	18	Translation initiation factor 1
C_134	18	18	Riboflavin kinase (EC 2.7.1.26) / FMN adenylyltransferase (EC 2.7.7.2)
C_135	18	18	SSU ribosomal protein S16p
C_136	18	18	Apolipoprotein N-acyltransferase (EC 2.3.1.-)
C_137	18	18	FIG00940404: hypothetical protein	FIG01151898: hypothetical protein
C_138	18	18	Hypothetical radical SAM family enzyme in heat shock gene cluster, similarity with CPO of BS HemN-type	Putative coproporphyrinogen III oxidase of BS HemN-type, oxygen-independent (EC 1.3.99.22), in heat shock gene cluster	Similar to coproporphyrinogen III oxidase, oxygen-independent (EC 1.3.99.22)
C_139	18	18	DNA-binding protein HU
*C_140	18	18	Possible transporter, membrane component
C_141	18	18	Acyl-phosphate:glycerol-3-phosphate O-acyltransferase PlsY
*C_142	18	18	UDP-3-O-[3-hydroxymyristoyl] N-acetylglucosamine deacetylase (EC 3.5.1.-)
C_143	18	18	Phosphoribosylaminoimidazole-succinocarboxamide synthase (EC 6.3.2.6)
C_144	18	18	LSU ribosomal protein L27p
C_145	18	18	FIG00941816: hypothetical protein	FIG01149488: hypothetical protein	FIG00940965: hypothetical protein	Probable transmembrane protein
C_146	18	18	Unclassified ABC-type transport system permease	possible permease
*C_147	18	18	Protein of unknown function DUF55	FIG00941629: hypothetical protein
C_148	18	18	DNA-directed RNA polymerase omega subunit (EC 2.7.7.6)
C_149	18	18	Membrane associated SBC domains
C_150	18	18	Cytochrome c-type biogenesis protein CcdA (DsbD analog)
C_151	18	18	8-amino-7-oxononanoate synthase (EC 2.3.1.47)
C_152	18	18	FOG: HEAT repeat	hypothetical protein
C_153	18	18	Prephenate dehydratase (EC 4.2.1.51)
C_154	18	18	COG0546: Predicted phosphatases
*C_155	18	18
C_156	18	18	LSU ribosomal protein L24p (L26e)
C_157	18	18	LSU ribosomal protein L23p (L23Ae)
C_158	18	18	Lipid A disaccharide synthetase related enzyme
C_159	18	18	TPR repeat precursor
C_160	18	18	tRNA dimethylallyltransferase (EC 2.5.1.75)
C_161	18	18	Glycosyltransferase
C_162	18	18	LSU ribosomal protein L9p
C_163	18	18	Agmatinase (EC 3.5.3.11)
C_164	18	18	Para-aminobenzoate synthase, aminase component (EC 2.6.1.85)
C_165	18	18	Multidrug efflux transporter, MFS family
*C_166	18	18	FIG00940730: hypothetical protein
*C_167	18	18	FIG01149308: hypothetical protein	FIG00940093: hypothetical protein
*C_168	18	18	FIG01150414: hypothetical protein
*C_169	18	18	FIG01149322: hypothetical protein	FIG00940868: hypothetical protein
*C_170	18	18	FIG01151185: hypothetical protein	FIG00940511: hypothetical protein
C_171	18	18	Cytochrome b559 alpha chain (PsbE)
*C_172	18	18	FIG01149617: hypothetical protein	FIG00940675: hypothetical protein
*C_173	18	18	Possible Helix-turn-helix domain of resolvase
*C_174	18	18	Possible 7kD DNA-binding domain
C_175	18	18	Cell division protein ZipN/Ftn2/Arc6, specific for cyanobacteria and chloroplast
*C_176	18	18	FIG00941330: hypothetical protein	FIG01149882: hypothetical protein
C_177	18	18	photosystem I subunit XI (PsaL)
C_178	18	18	Putative subunit of NAD(P)H:quinone oxidoreductase
*C_179	18	18	Possible conserved carboxylase domain
*C_180	18	18	FIG01149224: hypothetical protein	FIG00940064: hypothetical protein
*C_181	18	18	FIG00940708: hypothetical protein
* indicate functions which do not exist in any other organisms in any other forms
